# Supplementary material for: The Prevalence and Risk Factors of Acute Kidney Injury during Colistin Therapy: A Retrospective Cohort Study from Lebanon
Source: MDPI journal article supplement (doi:10.3390/antibiotics12071183), 2023-07-13
Supplement: s1 [file s1]

## Supplementary Materials

**Table S1:** Bivariate analysis of clinical characteristics and patient outcome associated with acute kidney injury among adult inpatients who received colistimethate sodium for  $\geq 48$  h from January 2015 to December 2018 (N = 298 patients) (N = 298 patients)

| Patient Characteristics                         | Total (N = 298 patients) (%) | CMS-induced AKI (N = 138 patients) (%) | No CMS-induced AKI (N = 160 patients) (%) | OR (95% CI)          | P       |
|-------------------------------------------------|------------------------------|----------------------------------------|-------------------------------------------|----------------------|---------|
| Age (years) (median, IQR)                       | 69 (51–80)                   | 76 (60–82)                             | 61 (39–77)                                |                      | <0.0001 |
| <55                                             | 87 (29.2%)                   | 25 (18.1%)                             | 62 (38.8%)                                | 0.350 (0.204–0.599)  | <0.0001 |
| 55 to <65                                       | 45 (15.1%)                   | 17 (12.3%)                             | 28 (17.5%)                                | 0.662 (0.345–1.270)  | 0.2     |
| 65 to <75                                       | 45 (15.1%)                   | 20 (14.5%)                             | 25 (15.6%)                                | 0.915 (0.484–1.732)  | 0.8     |
| $\geq 75$                                       | 121 (40.6%)                  | 76 (55.1%)                             | 45 (28.1%)                                | 3.133 (1.937–5.067)  | <0.0001 |
| Male                                            | 131 (44.0%)                  | 65 (47.1%)                             | 66 (41.3%)                                | 1.268 (0.801–2.007)  | 0.3     |
| Comorbidities                                   |                              |                                        |                                           |                      |         |
| Cardiovascular Disease                          | 122 (40.9%)                  | 75 (54.3%)                             | 47 (29.4%)                                | 2.862 (1.776–4.614)  | <0.0001 |
| Diabetes Mellitus                               | 94 (31.5%)                   | 54 (39.1%)                             | 40 (25.0%)                                | 1.929 (1.176–3.163)  | < 0.01  |
| Respiratory Disease                             | 51 (17.1%)                   | 31 (22.5%)                             | 20 (12.5%)                                | 2.028 (1.095–3.755)  | 0.02    |
| Chronic Kidney Disease                          | 89 (29.9%)                   | 70 (50.7%)                             | 19 (11.9%)                                | 7.639 (4.315–13.85)  | <0.0001 |
| Liver Disease                                   | 5 (1.7%)                     | 3 (2.2%)                               | 2 (1.3%)                                  | 1.756 (0.289–10.662) | 0.7     |
| Malignancy                                      | 95 (31.9%)                   | 43 (31.2%)                             | 52 (32.5%)                                | 0.940 (0.576–1.533)  | 0.8     |
| Hematologic Malignancy                          | 53 (17.8%)                   | 22 (15.9%)                             | 31 (19.4%)                                | 0.789 (0.433–1.440)  | 0.4     |
| Solid Tumor                                     | 42 (14.1%)                   | 21 (15.2%)                             | 21 (13.1%)                                | 1.188 (0.618–2.282)  | 0.6     |
| Cerebrovascular Disease                         | 102 (34.2%)                  | 47 (34.1%)                             | 55 (34.4%)                                | 0.986 (0.610–1.593)  | 1.0     |
| Charlson comorbidity index (CCI) upon admission | 5 (2–7)                      | 6 (4–8)                                | 4 (2–7)                                   |                      | <0.0001 |
| 0 to 2                                          | 83 (27.9%)                   | 20 (14.5%)                             | 63 (39.4%)                                | 0.261 (0.148–0.462)  | <0.0001 |
| 3 to 4                                          | 43 (14.4%)                   | 18 (13.0%)                             | 25 (15.6%)                                | 0.810 (0.421–1.558)  | 0.5     |
| $\geq 5$                                        | 172 (57.7%)                  | 100 (72.5%)                            | 72 (45.0%)                                | 3.216 (1.978–5.231)  | <0.0001 |

|                                                                        |                  |                  |                  |                      |         |
|------------------------------------------------------------------------|------------------|------------------|------------------|----------------------|---------|
| Baseline serum albumin before CMS initiation (g/dL) (median, IQR)      | 3.01 (2.50–3.70) | 3.01 (2.38–3.50) | 3.21 (2.58–3.86) |                      | 0.04    |
| < 3.5                                                                  | 198 (66.4%)      | 102 (73.9%)      | 96 (60.0%)       | 1.889 (1.152–3.097)  | 0.01    |
| Patient placement when CMS was initiated                               |                  |                  |                  |                      |         |
| Regular floor                                                          | 172 (57.7%)      | 61 (44.2%)       | 111 (69.4%)      | 0.350 (0.217–0.562)  | <0.0001 |
| Critical Care                                                          | 126 (42.3%)      | 77 (55.8%)       | 49 (30.6%)       | 2.859 (1.778–4.599)  | <0.0001 |
| During CMS therapy                                                     |                  |                  |                  |                      |         |
| Hypotension                                                            | 139 (46.6%)      | 93 (67.4%)       | 46 (28.8%)       | 5.122 (3.126–8.392)  | <0.0001 |
| Mechanical ventilation                                                 | 170 (57.0%)      | 104 (75.4%)      | 66 (41.3%)       | 4.357 (2.645–7.175)  | <0.0001 |
| Loading dose given                                                     | 231 (77.5%)      | 109 (79.0%)      | 122 (76.3%)      | 1.171 (0.677–2.025)  | 0.6     |
| Loading dose of 9 million international units given                    | 199 (66.8%)      | 94 (68.1%)       | 105 (65.6%)      | 1.119 (0.689–1.816)  | 0.7     |
| Concomitant Nephrotoxic Drugs                                          |                  |                  |                  |                      |         |
| Antimicrobials                                                         |                  |                  |                  |                      |         |
| Amikacin                                                               | 17 (5.7%)        | 10 (7.2%)        | 7 (4.4%)         | 1.708 (0.632–4.614)  | 0.3     |
| Vancomycin                                                             | 36 (12.1%)       | 12 (8.7%)        | 24 (15.0%)       | 0.540 (0.259–1.124)  | 0.1     |
| Rifampin                                                               | 2 (0.7%)         | 0 (0.0%)         | 2 (1.3%)         | -                    | 0.5     |
| Valaciclovir                                                           | 34 (11.4%)       | 10 (7.2%)        | 24 (15.0%)       | 0.443 (0.204–0.962)  | 0.04    |
| Aciclovir                                                              | 12 (4.0%)        | 4 (2.9%)         | 8 (5.0%)         | 0.567 (0.167–1.926)  | 0.4     |
| Ganciclovir                                                            | 8 (2.7%)         | 2 (1.4%)         | 6 (3.8%)         | 0.377 (0.075–1.901)  | 0.3     |
| Valganciclovir                                                         | 5 (1.7%)         | 0 (0.0%)         | 5 (3.1%)         | -                    | 0.06    |
| Amphotericin B                                                         | 14 (4.7%)        | 6 (4.3%)         | 8 (5.0%)         | 0.864 (0.292–2.553)  | 0.8     |
| Other drugs                                                            |                  |                  |                  |                      |         |
| Non-steroidal anti-inflammatory drugs                                  | 22 (7.4%)        | 11 (8.0%)        | 11 (6.9%)        | 1.173 (0.492–2.796)  | 0.7     |
| Angiotensin converting enzyme inhibitors/Angiotensin receptor blockers | 19 (6.4%)        | 10 (7.2%)        | 9 (5.6%)         | 1.311 (0.517–3.325)  | 0.7     |
| Diuretics                                                              | 112 (37.6%)      | 67 (48.6%)       | 45 (28.1%)       | 2.412 (1.493–3.897)  | <0.0001 |
| Vasopressors                                                           | 146 (49.0%)      | 99 (71.7%)       | 47 (29.4%)       | 6.103 (3.691–10.093) | <0.0001 |

|                                                                              |             |             |             |                     |         |
|------------------------------------------------------------------------------|-------------|-------------|-------------|---------------------|---------|
| Calcineurin Inhibitors (ciclosporin, tacrolimus)                             | 5 (1.7%)    | 2 (1.4%)    | 3 (1.9%)    | 0.770 (0.127–4.674) | 1.0     |
| Allopurinol                                                                  | 7 (2.3%)    | 2 (1.4%)    | 5 (3.1%)    | 0.456 (0.087–2.388) | 0.5     |
| Cytotoxic Chemotherapy*                                                      | 11 (3.7%)   | 2 (1.4%)    | 9 (5.6%)    | 0.247 (0.052–1.162) | 0.06    |
| Radio-contrast agents                                                        | 35 (11.7%)  | 11 (8.0%)   | 24 (15.0%)  | 0.491 (0.231–1.043) | 0.06    |
| Number of Concomitant Nephrotoxic Drugs (median, IQR)                        | 1 (1–2)     | 2 (1–2)     | 1 (1–2)     |                     | <0.01   |
| None                                                                         | 56 (18.8%)  | 18 (13.0%)  | 38 (23.8%)  | 0.482 (0.267–0.880) | 0.02    |
| ≥1                                                                           | 242 (81.2%) | 120 (87.0%) | 122 (76.3%) | 2.077 (1.136–3.751) | 0.02    |
| ≥2                                                                           | 145 (48.7%) | 86 (62.3%)  | 59 (36.9%)  | 2.831 (1.753–4.549) | <0.0001 |
| ≥3                                                                           | 64 (21.5%)  | 30 (21.7%)  | 34 (21.3%)  | 1.029 (0.593–1.803) | 0.9     |
| Indication of CMS                                                            |             |             |             |                     |         |
| Pneumonia                                                                    | 118 (39.6%) | 62 (44.9%)  | 56 (35.0%)  | 1.515 (0.950–2.417) | 0.08    |
| Blood-stream infection                                                       | 33 (11.1%)  | 17 (12.3%)  | 16 (10.0%)  | 1.264 (0.613–2.609) | 0.5     |
| Skin and soft tissue infection                                               | 17 (5.7%)   | 4 (2.9%)    | 13 (8.1%)   | 0.338 (0.107–1.061) | 0.05    |
| Sepsis                                                                       | 99 (33.2%)  | 48 (34.8%)  | 51 (31.9%)  | 1.140 (0.703–1.848) | 0.6     |
| Febrile Neutropenia                                                          | 33 (11.1%)  | 10 (7.2%)   | 23 (14.4%)  | 0.465 (0.213–1.016) | 0.05    |
| Colonization                                                                 | 23 (7.7%)   | 13 (9.4%)   | 10 (6.3%)   | 1.560 (0.662–3.679) | 0.3     |
| Urinary Tract Infection                                                      | 1 (0.3%)    | 0 (0.0%)    | 1 (0.6%)    | -                   | 1.0     |
| Fever of Unknown Origin                                                      | 11 (3.7%)   | 3 (2.2%)    | 8 (5.0%)    | 0.422 (0.110–1.624) | 0.2     |
| Documented Causative bacteria for which CMS was initiated                    |             |             |             |                     |         |
| Extensive drug-resistant/Carbapenem-resistant Gram-negative Bacteria         | 164 (55.0%) | 84 (60.9%)  | 80 (50.0%)  | 1.556 (0.982–2.475) | 0.06    |
| Extensive drug-resistant/Carbapenem-resistant <i>Acinetobacter baumannii</i> | 132 (44.3%) | 66 (47.8%)  | 66 (41.3%)  | 1.306 (0.825–2.066) | 0.3     |
| Extensive drug-resistant/Carbapenem-resistant <i>Pseudomonas aeruginosa</i>  | 28 (9.4%)   | 17 (12.3%)  | 11 (6.8%)   | 1.903 (0.869–4.333) | 0.1     |
| <i>Stenotrophomonas maltophilia</i>                                          | 16 (5.4%)   | 6 (4.3%)    | 10 (6.3%)   | 0.682 (0.241–1.927) | 0.5     |

|                                       |             |             |             |                     |     |
|---------------------------------------|-------------|-------------|-------------|---------------------|-----|
| Carbapenem-resistant Enterobacterales | 15 (5.0%)   | 9 (6.5%)    | 6 (3.8%)    | 1.791 (0.621–5.164) | 0.3 |
| Strategy of CMS Use                   |             |             |             |                     |     |
| Monotherapy                           | 42 (14.1%)  | 23 (16.7%)  | 19 (11.9%)  | 1.484 (0.770–2.859) | 0.3 |
| Combination therapy                   | 256 (85.9%) | 115 (83.3%) | 141 (88.1%) | 0.674 (0.350–1.298) | 0.3 |

Abbreviations: AKI = Acute Kidney Injury, CMS = colistimethate sodium, IQR = Interquartile Range, OR = Odds Ratio, CI = Confidence Interval. N.B.

\*Agents included Busulfan, Cyclophosphamide, Cytarabine, Etoposide, Fludarabine, Thiotepe

**Table S2:** Bivariate analysis of clinical characteristics and patient outcome associated with Stages 2 or 3 CMS-induced AKI compared to Stage 1 AKI (N = 138 patients)

|                                                                   | <b>Total CMS-Induced AKI (N = 138 patients) (%)</b> | <b>Stage 2 or 3 CMS-induced AKI (N = 86 patients) (%)</b> | <b>Stage 1 CMS-induced AKI (N = 52 patients) (%)</b> | <b>OR (95% CI)</b>  | <b>P</b> |
|-------------------------------------------------------------------|-----------------------------------------------------|-----------------------------------------------------------|------------------------------------------------------|---------------------|----------|
| Age (years) (median, IQR)                                         | 76 (60–82)                                          | 77(67–83)                                                 | 72 (54–81)                                           |                     | 0.1      |
| <55                                                               | 25 (18.1%)                                          | 11 (12.8%)                                                | 14 (26.9%)                                           | 0.398 (0.165–0.961) | 0.04     |
| 55 to <65                                                         | 17 (12.3%)                                          | 8 (9.3%)                                                  | 9 (17.3%)                                            | 0.490 (0.176–1.362) | 0.2      |
| 65 to <75                                                         | 20 (14.5%)                                          | 16 (18.6%)                                                | 4 (7.7%)                                             | 2.743 (0.864–8.711) | 0.09     |
| ≥75                                                               | 76 (55.1%)                                          | 51 (59.3%)                                                | 25 (48.1%)                                           | 1.574 (0.787–3.149) | 0.2      |
| Male                                                              | 65 (47.1%)                                          | 38 (44.2%)                                                | 27 (51.9%)                                           | 0.733 (0.367–1.462) | 0.4      |
| Comorbidities                                                     |                                                     |                                                           |                                                      |                     |          |
| Cardiovascular Disease                                            | 75 (54.3%)                                          | 50 (58.1%)                                                | 25 (48.1%)                                           | 1.500 (0.751–2.998) | 0.3      |
| Diabetes Mellitus                                                 | 54 (39.1%)                                          | 36 (41.9%)                                                | 18 (34.6%)                                           | 1.360 (0.666–2.778) | 0.4      |
| Respiratory Disease                                               | 31 (22.5%)                                          | 20 (23.3%)                                                | 11 (21.2%)                                           | 1.129 (0.491–2.597) | 0.8      |
| Chronic Kidney Disease                                            | 70 (50.7%)                                          | 49 (57.0%)                                                | 21 (40.39%)                                          | 1.995 (0.985–3.890) | 0.06     |
| Liver Disease                                                     | 3 (2.2%)                                            | 3 (3.5%)                                                  | 0 (0.0%)                                             | -                   | 0.3      |
| Malignancy                                                        | 43 (31.2%)                                          | 23 (26.7%)                                                | 20 (38.5%)                                           | 0.584 (0.280–1.218) | 0.2      |
| Hematologic Malignancy                                            | 22 (15.9%)                                          | 12 (14.0%)                                                | 10 (19.2%)                                           | 0.681 (0.271–1.710) | 0.4      |
| Solid Tumor                                                       | 21 (15.2%)                                          | 11 (12.8%)                                                | 10 (19.2%)                                           | 0.616 (0.242–1.571) | 0.3      |
| Cerebrovascular Disease                                           | 47 (34.1%)                                          | 31 (36.0%)                                                | 16 (30.8%)                                           | 1.268 (0.608–2.645) | 0.6      |
| Charlson comorbidity index (CCI) upon admission                   | 6 (4–8)                                             | 6 (5–8)                                                   | 6 (4–9)                                              |                     | 0.1      |
| 0 to 2                                                            | 20 (14.5%)                                          | 10 (11.6%)                                                | 10 (19.2%)                                           | 0.553 (0.213–1.435) | 0.2      |
| 3 to 4                                                            | 18 (13.0%)                                          | 11 (12.8%)                                                | 7 (13.5%)                                            | 0.943 (0.341–2.607) | 0.9      |
| ≥5                                                                | 100 (72.5%)                                         | 65 (75.6%)                                                | 35 (67.3%)                                           | 1.503 (0.703–3.215) | 0.3      |
| Baseline serum albumin before CMS initiation (g/dL) (median, IQR) | 3.01 (2.39–3.50)                                    | 2.85 (2.30–3.43)                                          | 3.18 (2.67–3.88)                                     |                     | <0.01    |

|                                                                              |              |                  |                  |                      |         |
|------------------------------------------------------------------------------|--------------|------------------|------------------|----------------------|---------|
| <3.5                                                                         | 102 (73.9%)  | 69 (80.2%)       | 33 (63.5%)       | 2.337 (1.077–5.071)  | 0.03    |
| Patient placement when CMS was initiated                                     |              |                  |                  |                      |         |
| Regular floor                                                                | 61 (44.2%)   | 31 (36.0%)       | 30 (57.7%)       | 0.413 (0.204–0.836)  | 0.01    |
| Critical Care                                                                | 77 (55.8%)   | 55 (64.0%)       | 22 (42.3%)       | 2.419 (1.196–4.894)  | 0.01    |
| During CMS therapy                                                           |              |                  |                  |                      |         |
| Hypotension                                                                  | 93 (67.4%)   | 68 (79.1%)       | 25 (48.1%)       | 4.080 (1.923–8.657)  | <0.0001 |
| Mechanical ventilation                                                       | 104 (75.4%)  | 74 (86.0%)       | 30 (57.7%)       | 4.522 (1.989–10.282) | <0.0001 |
| Cumulative CMS dose prior to AKI (median, IQR) (million international units) | 31.5 (18–61) | 41.0 (21.0–72.0) | 19.8 (12.3–33.9) |                      | <0.0001 |
| Days of CMS therapy prior to AKI (median, IQR)                               | 4 (2–8)      | 6 (3–10)         | 2 (1–4)          |                      | <0.0001 |
| 2                                                                            | 46 (33.3%)   | 18 (20.9%)       | 28 (53.8%)       | 0.227 (0.105–0.476)  | 0.0001  |
| 3 to <7                                                                      | 32 (23.2%)   | 19 (22.1%)       | 13 (25.0%)       | 0.851 (0.381–1.940)  | 0.7     |
| ≥7                                                                           | 60 (43.5%)   | 49 (57.0%)       | 11 (21.2%)       | 4.936 (2.299–11.29)  | <0.0001 |
| Loading dose given                                                           | 109 (79.0%)  | 73 (84.9%)       | 36 (69.2%)       | 2.496 (1.084–5.744)  | 0.03    |
| Loading dose of 9 million international units given                          | 94 (68.1%)   | 64 (74.4%)       | 30 (57.7%)       | 2.133 (1.025–4.440)  | 0.04    |
| Concomitant Nephrotoxic Drugs                                                |              |                  |                  |                      |         |
| Antimicrobials                                                               |              |                  |                  |                      |         |
| Amikacin                                                                     | 10 (7.2%)    | 8 (9.3%)         | 2 (3.8%)         | 2.564 (0.523–12.569) | 0.3     |
| Vancomycin                                                                   | 12 (8.7%)    | 9 (10.5%)        | 3 (5.8%)         | 1.909 (0.493–7.400)  | 0.5     |
| Valaciclovir                                                                 | 10 (7.2%)    | 5 (5.8%)         | 5 (9.6%)         | 0.580 (0.160–2.109)  | 0.5     |
| Aciclovir                                                                    | 4 (2.9%)     | 1 (1.2%)         | 3 (5.8%)         | 0.192 (0.019–1.898)  | 0.1     |
| Ganciclovir                                                                  | 2 (1.4%)     | 1 (1.2%)         | 1 (1.9%)         | 0.600 (0.037–9.802)  | 1.0     |
| Amphotericin B                                                               | 6 (4.3%)     | 3 (3.5%)         | 3 (5.8%)         | 0.590 (0.115–3.040)  | 0.7     |
| Other drugs                                                                  |              |                  |                  |                      |         |

|                                                                        |             |            |            |                      |         |
|------------------------------------------------------------------------|-------------|------------|------------|----------------------|---------|
| Non-steroidal anti-inflammatory drugs                                  | 11 (8.0%)   | 6 (7.0%)   | 5 (9.6%)   | 0.705 (0.204–2.437)  | 0.7     |
| Angiotensin converting enzyme inhibitors/Angiotensin receptor blockers | 10 (7.2%)   | 7 (8.1%)   | 3 (5.8%)   | 1.447 (0.357–5.861)  | 0.7     |
| Diuretics                                                              | 67 (48.6%)  | 50 (58.1%) | 17 (32.7%) | 2.859 (1.391–5.878)  | <0.01   |
| Vasopressors                                                           | 99 (71.7%)  | 74 (86.0%) | 25 (48.1%) | 6.660 (2.941–15.081) | <0.0001 |
| Calcineurin Inhibitors (ciclosporin, tacrolimus)                       | 2 (1.4%)    | 0 (0.0%)   | 2 (3.8%)   | -                    | 0.1     |
| Allopurinol                                                            | 2 (1.4%)    | 1 (1.2%)   | 1 (1.9%)   | 0.600 (0.037–9.802)  | 1.0     |
| Cytotoxic Chemotherapy                                                 | 2 (1.4%)    | 2 (2.3%)   | 0 (0.0%)   | -                    | 1.0     |
| Radio-contrast agents                                                  | 11 (8.0%)   | 7 (8.1%)   | 4 (7.7%)   | 1.063 (0.296–3.823)  | 1.0     |
| Number of Concomitant Nephrotoxic Drugs (median, IQR)                  | 2 (1–2)     | 2 (1–2)    | 1 (1–2)    |                      | <0.01   |
| None                                                                   | 18 (13.0%)  | 6 (7.0%)   | 12 (23.1%) | 1.0 (0.346–2.905)    | 1.0     |
| ≥1                                                                     | 120 (87.0%) | 80 (93.0%) | 40 (76.9%) | 4.0 (1.373–11.470)   | <0.01   |
| ≥2                                                                     | 86 (62.3%)  | 63 (73.3%) | 23 (44.2%) | 3.454 (1.658–7.046)  | <0.01   |
| ≥3                                                                     | 30 (21.7%)  | 20 (23.3%) | 10 (19.2%) | 1.273 (0.568–2.994)  | 0.6     |
| Renal recovery                                                         |             |            |            |                      |         |
| Reversible AKI                                                         | 29 (21.0%)  | 12 (14.0%) | 17 (32.7%) | 0.334 (0.144–0.774)  | <0.01   |
| partially                                                              | 15 (10.9%)  | 12 (14.0%) | 3 (5.8%)   | 2.649 (0.711–9.872)  | 0.1     |
| completely                                                             | 14 (10.1%)  | 0 (0.0%)   | 14 (26.9%) | -                    | <0.0001 |
| Irreversible AKI                                                       | 109 (79.0%) | 74 (86.0%) | 35 (67.3%) | 2.995 (1.291–6.947)  | <0.01   |

Abbreviations: AKI = Acute Kidney Injury, CMS = colistimethate sodium, IQR = Interquartile Range, OR = Odds Ratio, CI = Confidence Interval. N.B. \*Agents included Cytarabine, Etoposide, Fludarabine

**Table S3:** Bivariate analysis of clinical characteristics associated with all-cause mortality among adult inpatients who received colistimethate sodium for  $\geq 48$  hours (N = 298 patients)

| Patient Characteristics                         | Total (N = 298 patients) (%) | All-cause Mortality (N = 153 patients) (%) | Survival (N = 145 patients) (%) | OR (95% CI)          | P       |
|-------------------------------------------------|------------------------------|--------------------------------------------|---------------------------------|----------------------|---------|
| Age (years) (median, interquartile range (IQR)) | 69 (51–80)                   | 78 (66–84)                                 | 67(49–78)                       |                      | <0.0001 |
| <55                                             | 87 (29.2%)                   | 21 (13.7%)                                 | 66 (45.5)                       | 0.19 (0.108–0.335)   | <0.0001 |
| 55 to <65                                       | 45 (15.1%)                   | 21 (13.7%)                                 | 24 (16.6%)                      | 0.802 (0.425–1.514)  | 0.5     |
| 65 to <75                                       | 45 (15.1%)                   | 24 (15.7%)                                 | 21 (14.5%)                      | 1.099 (0.582–2.074)  | 0.8     |
| $\geq 75$                                       | 121 (40.6%)                  | 87 (56.9%)                                 | 34 (23.4%)                      | 4.303 (2.610–7.095)  | <0.0001 |
| Male                                            | 131 (44.0%)                  | 62 (40.5%)                                 | 69 (47.6%)                      | 0.750 (0.474–1.187)  | 0.2     |
| Comorbidities                                   |                              |                                            |                                 |                      |         |
| Cardiovascular Disease                          | 122 (40.9%)                  | 85 (55.6%)                                 | 37 (25.5%)                      | 3.649 (2.233–5.962)  | <0.0001 |
| Diabetes Mellitus                               | 94 (31.5%)                   | 59 (38.6%)                                 | 35 (24.1%)                      | 1.973 (1.196–3.254)  | 0.007   |
| Respiratory Disease                             | 51 (17.1%)                   | 29 (19.0%)                                 | 22 (15.2%)                      | 1.308 (0.712–2.401)  | 0.4     |
| Chronic Kidney Disease                          | 89 (29.9%)                   | 65 (42.5%)                                 | 24 (16.6%)                      | 3.724 (2.167–6.381)  | <0.0001 |
| Liver Disease                                   | 5 (1.7%)                     | 5 (3.3%)                                   | 0 (0.0%)                        | -                    | 0.06    |
| Malignancy                                      | 95 (31.9%)                   | 46 (30.1%)                                 | 49 (33.8%)                      | 0.842 (0.517–1.372)  | 0.5     |
| Hematologic Malignancy                          | 53 (17.8%)                   | 19 (12.4%)                                 | 34 (23.4%)                      | 0.463 (0.250–0.856)  | 0.01    |
| Solid Tumor                                     | 42 (14.1%)                   | 27 (17.6%)                                 | 15 (10.3%)                      | 1.857 (0.944–3.655)  | 0.07    |
| Cerebrovascular Disease                         | 102 (34.2%)                  | 59 (38.6%)                                 | 43 (29.7%)                      | 1.489 (0.919–2.413)  | 0.1     |
| Charlson comorbidity index (CCI) upon admission | 5 (2–7)                      | 6 (5–8)                                    | 4 (2–7)                         |                      | <0.0001 |
| 0 to 2                                          | 83 (27.9%)                   | 20 (13.1%)                                 | 63 (43.4%)                      | 0.196 (0.110–0.347)  | <0.0001 |
| 3 to 4                                          | 43 (14.4%)                   | 13 (8.5%)                                  | 30 (20.7%)                      | 0.356 (0.177–0.714)  | <0.01   |
| $\geq 5$                                        | 172 (57.7%)                  | 120 (78.4%)                                | 52 (55.9%)                      | 6.503 (3.892–10.867) | <0.0001 |



|                                                                              |                  |                  |                  |                      |         |
|------------------------------------------------------------------------------|------------------|------------------|------------------|----------------------|---------|
| Baseline serum albumin before CMS initiation (g/dL) (median, IQR)            | 3.01 (2.50–3.70) | 2.91 (2.35–3.44) | 3.25 (2.66–4.05) |                      | <0.0001 |
| < 3.5                                                                        | 198 (66.4%)      | 113 (73.9%)      | 85 (58.6%)       | 1.994 (1.223–3.252)  | <0.01   |
| Patient placement when CMS was initiated                                     |                  |                  |                  |                      |         |
| Regular floor                                                                | 172 (57.7%)      | 72 (47.1%)       | 100 (69.0%)      | 0.400 (0.249–0.642)  | <0.0001 |
| Critical Care                                                                | 126 (42.3%)      | 81 (52.9%)       | 45 (31.0%)       | 2.500 (1.556–4.016)  | <0.0001 |
| During CMS therapy                                                           |                  |                  |                  |                      |         |
| Hypotension                                                                  | 139 (46.6%)      | 108 (70.6%)      | 31 (21.4%)       | 8.826 (5.206–14.961) | <0.0001 |
| Mechanical ventilation                                                       | 170 (57.0%)      | 118 (77.1%)      | 52 (35.9%)       | 6.030 (3.630–10.015) | <0.0001 |
| Cumulative CMS dose prior to AKI (median, IQR) (million international units) | 45 (26–90)       | 33 (18–63.5)     | 27(18–36.75)     |                      | <0.01   |
| Loading dose given                                                           | 231 (77.5%)      | 123 (80.4%)      | 108 (74.5%)      | 1.405 (0.813–2.426)  | 0.2     |
| Loading dose of 9 million international units given                          | 199 (66.8%)      | 103 (67.3%)      | 96 (66.2%)       | 1.051 (0.649–1.703)  | 0.8     |
| Concomitant Nephrotoxic Drugs                                                |                  |                  |                  |                      |         |
| Antimicrobials                                                               |                  |                  |                  |                      |         |
| Amikacin                                                                     | 17 (5.7%)        | 7 (4.6%)         | 10 (6.9%)        | 0.647 (0.240–1.749)  | 0.4     |
| Vancomycin                                                                   | 36 (12.1%)       | 16 (10.5%)       | 20 (13.8%)       | 0.730 (0.362–1.471)  | 0.4     |
| Rifampin                                                                     | 2 (0.7%)         | 0 (0.0%)         | 2 (1.4%)         | -                    | 0.2     |
| Valaciclovir                                                                 | 34 (11.4%)       | 9 (5.9%)         | 25 (17.2%)       | 0.300 (0.135–0.667)  | <0.01   |
| Aciclovir                                                                    | 12 (4.0%)        | 4 (2.6%)         | 8 (5.5%)         | 0.460 (0.135–1.561)  | 0.2     |
| Ganciclovir                                                                  | 8 (2.7%)         | 3 (2.0%)         | 5 (3.4%)         | 0.560 (0.131–2.387)  | 0.5     |
| Valganciclovir                                                               | 5 (1.7%)         | 0 (0.0%)         | 5 (3.4%)         | -                    | 0.03    |
| Amphotericin B                                                               | 14 (4.7%)        | 5 (3.3%)         | 9 (6.2%)         | 0.511 (0.167–1.561)  | 0.2     |
| Other drugs                                                                  |                  |                  |                  |                      |         |
| Non-steroidal anti-inflammatory drugs                                        | 22 (7.4%)        | 9 (5.9%)         | 13 (9.0%)        | 0.635 (0.263–1.533)  | 0.3     |

|                                                                        |             |             |             |                       |         |
|------------------------------------------------------------------------|-------------|-------------|-------------|-----------------------|---------|
| Angiotensin converting enzyme inhibitors/Angiotensin receptor blockers | 19 (6.4%)   | 11 (7.2%)   | 8 (5.5%)    | 1.327 (0.518–3.396)   | 0.6     |
| Diuretics                                                              | 112 (37.6%) | 79 (51.6%)  | 33 (22.8%)  | 3.623 (2.195–5.961)   | <0.0001 |
| Vasopressors                                                           | 146 (49.0%) | 117 (76.5%) | 29 (20.0%)  | 13.000 (7.483–22.586) | <0.0001 |
| Calcineurin Inhibitors (ciclosporin, tacrolimus)                       | 5 (1.7%)    | 1 (0.7%)    | 4 (2.8%)    | 0.232 (0.026–2.100)   | 0.2     |
| Allopurinol                                                            | 7 (2.3%)    | 1 (0.7%)    | 6 (4.1%)    | 0.152 (0.018–1.282)   | 0.06    |
| Cytotoxic Chemotherapy*                                                | 11 (3.7%)   | 2 (1.3%)    | 9 (6.2%)    | 0.200 (0.042–0.943)   | 0.03    |
| Radio-contrast agents                                                  | 35 (11.7%)  | 17 (11.1%)  | 18 (12.4%)  | 0.882 (0.436–1.786)   | 0.7     |
| Number of Concomitant Nephrotoxic Drugs (median, IQR)                  | 1 (1–2)     | 2 (1–2)     | 1 (0–2)     |                       | <0.001  |
| None                                                                   | 56 (18.8%)  | 17 (11.1%)  | 39 (26.9%)  | 0.340 (0.183–0.628)   | <0.001  |
| ≥1                                                                     | 242 (81.2%) | 136 (88.9%) | 106 (73.1%) | 2.943 (1.591–5.459)   | <0.001  |
| ≥2                                                                     | 145 (48.7%) | 96 (62.7%)  | 49 (33.8%)  | 3.30 (2.030–5.362)    | <0.0001 |
| ≥3                                                                     | 64 (21.5%)  | 33 (21.6%)  | 31 (21.4%)  | 1.011 (0.577–1.786)   | 1.0     |
| Indication of CMS                                                      |             |             |             |                       |         |
| Pneumonia                                                              | 118 (39.6%) | 69 (45.1%)  | 49 (33.8%)  | 1.609 (1.007–2.572)   | 0.05    |
| Blood-stream infection                                                 | 33 (11.1%)  | 18 (11.8%)  | 15 (10.3%)  | 1.156 (0.559–2.389)   | 0.7     |
| Skin and soft tissue infection                                         | 17 (5.7%)   | 3 (2.0%)    | 14 (9.7%)   | 0.187 (0.053–0.666)   | <0.01   |
| Sepsis                                                                 | 99 (33.2%)  | 61 (39.9%)  | 38 (26.2%)  | 1.867 (1.142–3.053)   | 0.01    |
| Febrile Neutropenia                                                    | 33 (11.1%)  | 8 (5.2%)    | 25 (17.2%)  | 0.265 (0.115–0.609)   | <0.01   |
| Colonization                                                           | 23 (7.7%)   | 12 (7.8%)   | 11 (7.6%)   | 1.037 (0.442–2.430)   | 0.9     |
| Urinary Tract Infection                                                | 1 (0.3%)    | 1 (0.7%)    | 0 (0.0%)    | -                     | 1.0     |
| Fever of Unknown Origin                                                | 11 (3.7%)   | 4 (2.6%)    | 7 (4.8%)    | 0.529 (0.152–1.847)   | 0.3     |
| Documented Causative bacteria for which CMS was initiated              |             |             |             |                       |         |
| Extensive drug-resistant/Carbapenem-resistant Gram-negative Bacteria   | 164 (55.0%) | 88 (57.5%)  | 76 (52.4%)  | 1.229 (0.778–1.944)   | 0.4     |

|                                                                              |             |             |             |                      |         |
|------------------------------------------------------------------------------|-------------|-------------|-------------|----------------------|---------|
| Extensive drug-resistant/Carbapenem-resistant <i>Acinetobacter baumannii</i> | 132 (44.3%) | 71 (46.4%)  | 61 (42.1%)  | 1.192 (0.754–1.885)  | 0.5     |
| Extensive drug-resistant/Carbapenem-resistant <i>Pseudomonas aeruginosa</i>  | 28 (9.4%)   | 14 (9.2%)   | 14 (9.7%)   | 0.942 (0.430–2.068)  | 0.9     |
| <i>Stenotrophomonas maltophilia</i>                                          | 16 (5.4%)   | 7 (4.6%)    | 9 (6.2%)    | 0.725 (0.263–1.999)  | 0.5     |
| Carbapenem-resistant Enterobacterales                                        | 15 (5.0%)   | 8 (5.2%)    | 7 (4.8%)    | 1.088 (0.384–3.080)  | 0.9     |
| Strategy of CMS Use                                                          |             |             |             |                      |         |
| Monotherapy                                                                  | 42 (14.1%)  | 19 (12.4%)  | 23 (15.9%)  | 0.752 (0.391–1.448)  | 0.4     |
| Combination therapy                                                          | 256 (85.9%) | 134 (87.6%) | 122 (84.1%) | 1.330 (0.690–2.560)  | 0.4     |
| Development of CMS-induced AKI                                               | 138 (46.3%) | 106 (69.3%) | 32 (22.1%)  | 7.964 (4.727–13.417) | <0.0001 |
| Severity of AKI                                                              |             |             |             |                      |         |
| Stage1                                                                       | 52 (17.4%)  | 34 (22.2%)  | 18 (12.4%)  | 0.12 (0.064–0.227)   | <0.0001 |
| Stages 2 or 3                                                                | 86 (28.9%)  | 72 (47.1%)  | 14 (9.7%)   | 8.317 (4.403–15.711) | <0.0001 |

Abbreviations: AKI = Acute Kidney Injury, CMS = colistimethate sodium, IQR = Interquartile Range, OR = Odds Ratio, CI = Confidence Interval. N.B. \*Agents included Busulfan, Cyclophosphamide, Cytarabine, Etoposide, Fludarabine, Thiotepe
